# Relationship Between Blood Pressure and Anthropometry in a Cohort of Brazilian Men: A Cross-Sectional Study

Roberta S.L. Cassani<sup>1</sup>, Fernando Nobre<sup>1</sup>, Antônio Pazin-Filho<sup>1</sup> and André Schmidt<sup>1</sup>

## BACKGROUND

Hypertension, a risk factor for cardiovascular diseases, and obesity are becoming a health problem in many developed and developing countries, as Brazil. Although hypertension and obesity are both closely associated, there is no universal anthropometric marker of this association. This is probably due to distinct population characteristics, and in the case of Brazil, the highly heterogeneous population. We evaluated which anthropometric measurement most closely relates to high blood pressure in a sample of Brazilian factory workers.

## METHODS

A cross-sectional study was designed. In this study, multiple logistic regression and receiver operating characteristics analysis were performed in order to obtain the precise relevance of each anthropometric measurement as a blood pressure marker. Nine hundred and thirteen men,  $36 \pm 8$  years-old, were submitted to a standardized questionnaire of demographic and risk factors knowledge, anthropometric and conventional blood pressure

measurements were taken, and blood sample evaluations of glucose, total cholesterol, LDL-Cholesterol, and triglycerides were performed.

## RESULTS

Overweightness or obesity was identified in 64, 11.1% were smokers and hypertension was detected in 29.2% of the participants. A linear correlation was significant ( $P < 0.001$ ) between both the systolic and diastolic blood pressure and all anthropometric measurements, except for the systolic blood pressure and waist-to-hip ratio. Waist circumference (WC) was the only independent anthropometric measurement related to hypertension. Hypertensive patients presented all anthropometric measurements larger than normotensives.

## CONCLUSIONS

Age and WC were the only independent predictors of hypertension, indicating that this simple measurement may be useful as a marker of hypertension in the Brazilian male, younger adult population.

*Am J Hypertens* 2009; **22**:980-984 © 2009 American Journal of Hypertension, Ltd.

Elevated blood pressure is a well recognized risk factor for cardiovascular diseases, like coronary artery disease, stroke, and heart failure. Obesity is an established health problem in many developed and developing countries.<sup>1</sup> It has long been recognized as closely associated with high blood pressure<sup>2</sup> although the mechanism is not clearly understood. The cluster of central obesity and hypertension is frequently associated with metabolic abnormalities in the so called "metabolic syndrome". Clinical trials have shown that weight loss is capable of reducing blood pressure.<sup>3,4</sup>

The body mass index (BMI) is the most traditional method for defining overweightness and obesity, but various measures of obesity, e.g., waist and hip circumferences, waist-to-hip ratio, waist-to-height ratio among others, have been employed to explore this relation.<sup>5</sup> The waist-to-height ratio is an emerging anthropometric measurement. It will change only

when there is a change in the numerator (waist circumference (WC)) given that the denominator (height) remains constant in adults. A recent meta-analysis indicated that the waist-to-height ratio is a good discriminator of cardiovascular disease risk factors.<sup>6</sup> Much debate exists about the most adequate anthropometric measurement for detecting increased adiposity, especially in men, where abdominal fat accumulation may not be detected by many traditional indexes of obesity, like BMI.<sup>7-9</sup> There is increasingly evidence that the BMI and other anthropometric measurements may be even related to long term survival.<sup>10,11</sup> As there are regional differences due to socioeconomic and ethnical issues, it seems appropriate to expand the pool of available data for each part of the world to determine the best anthropometric method that can predict the occurrence of hypertension.

The purpose of our study was to evaluate which anthropometric measurement closely relates to elevated blood pressure in a sample of Brazilian factory workers.

## METHODS

The study protocol was approved by the institutional review board of the Hospital das Clínicas da Faculdade de Medicina

<sup>1</sup>Cardiology Division, Medical School of Ribeirão Preto, University of São Paulo, Ribeirão Preto, Brazil. Correspondence: André Schmidt (aschmidt@fmrp.usp.br)

Received 29 September 2008; first decision 1 November 2008; accepted 8 May 2009; advance online publication 4 June 2009. doi:10.1038/ajh.2009.104

© 2009 American Journal of Hypertension, Ltd.

de Ribeirão Preto, University of São Paulo. A cohort of 913 men, workers of the same factory plant located in the city of Itu, in São Paulo State, Brazil, was evaluated. They were invited to participate during annual routine medical evaluation and no refusals occurred. All volunteers signed an informed consent.

A standardized questionnaire was applied to obtain information about the workers' previous medical history, use of medications, knowledge of cardiovascular risk factors, and demographic data.

Anthropometric measurements were obtained with the participants standing and wearing indoor clothes and no shoes. Their height and weight were measured with a daily calibrated scale. The anthropometric measurements were obtained according to the NHANES III protocol (<http://www.cdc.gov/nchs/data/nhanes/nhanes3/cdrom/nchs/manuals/anthro.pdf>). Overweightness was identified if the BMI  $\geq 25$  kg/m<sup>2</sup> and obesity was defined if the BMI  $\geq 30$  kg/m<sup>2</sup>. The skinfold thickness was reported as the mean of three consecutive measurements of the subscapular, triceps, suprailiac, and abdominal skinfolds (Lange caliper; Beta Technologies, Santa Cruz, CA). Blood pressure measurements were collected using an automatic and validated blood pressure device (Omron—model HEM 705-CP) with the patient seated and after 5 min of rest. Three measurements with 1 min intervals were obtained and the mean value was used. The cuff size was selected according to arm circumference. Hypertension was defined if the mean pressure was  $\leq 140$  mm Hg for systolic blood pressure and/or 90 mm Hg for diastolic blood pressure, or if the patient referred to the use of antihypertensive medication.

**Data analysis.** Data are expressed as mean  $\pm$  s.d. Pearson's linear correlation with systolic and diastolic blood pressure were calculated, as well as Fishers' exact test to assess probability of association. Receiver operating characteristics curves were created in order to obtain the sensitivity and specificity of each as a blood pressure marker. Stepwise multiple logistic regression models including age, BMI, waist and hip circumferences, skinfolds and waist-to-height ratio, were performed to adjust for potential confounders. All variables were tested for normal distribution using the Kolmogorov–Smirnov test and were normally distributed, except when indicated. Parametric tests were applied and the level of significance was established as 5%.

## RESULTS

### Characteristics of the participants

**Table 1** summarizes the demographic and clinical and anthropometric characteristics of the participants. Overweightness or obesity were identified in 64% of the participants and hypertension was detected in 29.2% of the participants and nearly half of the sample was in the prehypertension stage. No participant was previously on medical treatment for hypertension.

### Blood pressure and anthropometry

Linear correlation was significant ( $P < 0.001$ ) between both the systolic and diastolic blood pressure for all anthropometric measurements, except for the waist-to-hip ratio, that was not

**Table 1 | Demographic, anthropometric, and clinical characteristics of participants**

|                                                |                 |
|------------------------------------------------|-----------------|
| Sample number                                  | 913             |
| Age (years)                                    | 36 $\pm$ 8      |
| Height (cm)                                    | 1.7 $\pm$ 0.1   |
| Weight (kg)                                    | 77.7 $\pm$ 13.1 |
| BMI (kg/m <sup>2</sup> )                       | 26.7 $\pm$ 4.0  |
| BMI category                                   |                 |
| Underweight (<18.5)                            | 0.7%            |
| Normal (18.5–24.9)                             | 34.9%           |
| Overweight (25.0–29.9)                         | 47.0%           |
| Obese class I (30–34.9)                        | 13.9%           |
| Obese class II (35–39.9)                       | 2.6%            |
| Obese class III ( $\geq 40.0$ )                | 0.9%            |
| WC (cm)                                        | 92.4 $\pm$ 11.4 |
| Hip circumference (cm)                         | 101.7 $\pm$ 8.6 |
| Waist-to-hip ratio                             | 1.05 $\pm$ 0.13 |
| Skinfold thickness (mm)                        |                 |
| Subscapular                                    | 20 $\pm$ 7      |
| Triceps                                        | 15 $\pm$ 7      |
| Suprailiac                                     | 17 $\pm$ 8      |
| Abdominal                                      | 30 $\pm$ 14     |
| Systolic blood pressure (mm Hg)                | 130 $\pm$ 15    |
| Diastolic blood pressure (mm Hg)               | 79 $\pm$ 12     |
| Hypertension category                          |                 |
| Normal                                         | 23.3%           |
| Prehypertension                                | 46.7%           |
| Stage 1 hypertension                           | 23.4%           |
| Stage 2 hypertension                           | 6.6%            |
| % Smokers                                      | 11.1            |
| BMI, body mass index; WC, waist circumference. |                 |

normally distributed, and varied between 0.22 and 0.39 as seen in **Table 2**.

A consistent increase in the systolic and diastolic blood pressure could be observed with increasing WC and BMI when these measurements were analyzed in quintiles, except for waist-to-hip ratio that presented an initial increase in both blood pressure levels followed by a reduction in higher values.

The participants with a WC above 94 cm had higher systolic (137  $\pm$  15 vs. 128  $\pm$  15 mm Hg;  $P < 0.001$ ) and diastolic (86  $\pm$  11 vs. 77  $\pm$  11 mm Hg;  $P < 0.001$ ) blood pressure than those with a WC below 94 cm. Similar features could also be identified for the BMI. The overweight participants had higher systolic (133  $\pm$  15 vs. 124  $\pm$  14 mm Hg;  $P < 0.001$ ) and diastolic (82  $\pm$  12 vs. 73  $\pm$  11 mm Hg;  $P < 0.001$ ) blood pressure than those with a BMI below 24.9 kg/m<sup>2</sup>.

A WC below 94 cm and a BMI below 24.9 kg/m<sup>2</sup> yielded a negative predictive value for the presence of hypertension in 80 and 85%, respectively. The skinfold measurements correlated with conventional blood pressure measurements, especially

**Table 2 | Linear correlation coefficients between anthropometric indices and systolic and diastolic blood pressure**

| Anthropometric measurement | Systolic blood pressure | Diastolic blood pressure |
|----------------------------|-------------------------|--------------------------|
| BMI                        | 0.33*                   | 0.39*                    |
| WC                         | 0.34*                   | 0.39*                    |
| Waist-to-height ratio      | 0.31*                   | 0.37*                    |
| Skinfold                   |                         |                          |
| Triceps                    | 0.11*                   | 0.22*                    |
| Subscapular                | 0.22*                   | 0.31*                    |
| Suprailiac                 | 0.19*                   | 0.28*                    |
| Abdominal                  | 0.19*                   | 0.24*                    |

\* $P < 0.001$ .

BMI, body mass index; WC, waist circumference.

**Table 3 | Differences in age, blood pressure and anthropometric indices among participants according to the presence of hypertension**

|                                  | Normotensive (n = 646) | Hypertensive (n = 267) | P      |
|----------------------------------|------------------------|------------------------|--------|
| Age (years)                      | 35.2 ± 8.0             | 37.7 ± 9.1             | <0.001 |
| WC (cm)                          | 90.2 ± 10.4            | 97.6 ± 11.9            | <0.001 |
| BMI (kg/m <sup>2</sup> )         | 26.0 ± 3.7             | 28.4 ± 4.2             | <0.001 |
| Waist-to-hip ratio               | 1.1 ± 0.1              | 1.0 ± 0.1              | <0.014 |
| Waist-to-height ratio            | 0.53 ± 0.06            | 0.57 ± 0.07            | <0.001 |
| Diastolic blood pressure (mm Hg) | 74 ± 9                 | 90 ± 10                | <0.001 |
| Skinfold (mm)                    |                        |                        |        |
| Subscapular                      | 18.9 ± 6.7             | 22.4 ± 7.9             | <0.001 |
| Triceps                          | 14.5 ± 6.5             | 16.5 ± 7.4             | <0.001 |
| Bicipital                        | 10.1 ± 5.2             | 12.3 ± 6.9             | <0.001 |
| Suprailiac                       | 16.5 ± 7.0             | 19.5 ± 9.2             | <0.001 |
| Abdominal                        | 28.5 ± 13.4            | 33.5 ± 13.8            | <0.001 |

BMI, body mass index; WC, waist circumference.

**Table 4 | Stepwise multiple linear regression of anthropometric indices related to the presence of hypertension on univariate analysis**

|                       | Odds ratio | 95% CI      | P      |
|-----------------------|------------|-------------|--------|
| Age                   | 1.03       | (1.01–1.05) | 0.01   |
| BMI                   | 1.05       | (0.94–1.16) | 0.39   |
| WC                    | 1.07       | (1.03–1.11) | <0.001 |
| Hip circumference     | 1.02       | (0.98–1.05) | 0.36   |
| Triceps skinfold      | 1.00       | (0.97–1.03) | 0.95   |
| Bicipital skinfold    | 1.01       | (0.97–1.05) | 0.60   |
| Subscapular skinfold  | 1.02       | (0.99–1.05) | 0.24   |
| Suprailiac skinfold   | 0.99       | (0.96–1.02) | 0.54   |
| Abdominal skinfold    | 1.00       | (0.99–1.02) | 0.92   |
| Waist-to-height ratio | 0.006      | (0.00–1.20) | 0.06   |

BMI, body mass index; CI, confidence interval; WC, waist circumference.

for the diastolic blood pressure, and the central ones presented better correlation values compared to the peripheric (triceps) skinfold (Table 2).

### Hypertension and anthropometry

Among the participants, hypertension was detected in 267 (29.2%). Table 3 summarizes the differences between the hypertensive and normotensive participants.

The WC and BMI had similar results in the receiver operating characteristics analysis (0.68;  $P < 0.001$ ). Among skinfolds, subscapular was the one with the highest receiver operating characteristics value (0.63, confidence interval (CI): 0.59–0.67;  $P < 0.001$ ).

In order to assess the influence of age and anthropometric variables, a multiple logistic regression analysis model was computed. As shown in Table 4, age and WC were the only independent predictors of hypertension.

### DISCUSSION

In this cohort of adult men, with a relatively young age, we observed that the blood pressure increased with higher BMI, WC, and various skinfold locations. The relation was linear and no threshold was noted. Multivariate analysis identified that only age and WC were significantly associated with the presence of hypertension. Another important finding was the elevated prevalence of overweightness and hypertension. There is a large variation in overweightness/obesity prevalence in Brazil, mainly due to its regional inequalities, ranging from 15 to 54%,<sup>12–14</sup> and our population presented one of the highest levels.

The “metabolic syndrome” diagnostic criteria include both elevated blood pressure and WC above 102 cm,<sup>15</sup> an association that seems to be frequent in the overweight strata. There is some evidence that the mechanism of obesity-associated hypertension is related to inadequate vasodilatation of blood vessels in response to increased intravascular volume and cardiac output, an effect related with an increased sympathetic nervous system tone and insulin resistance. So, in a group of overweight individuals, higher values of blood pressure are expected.

Few studies have explored the relationship between a large set of anthropometric measurements and blood pressure in the Brazilian adult population,<sup>16–19</sup> as well as in other parts of the world.<sup>20,21</sup> A positive association between WC and BMI, similar to other studies,<sup>8,22–25</sup> and blood pressure was noted. This association occurred for systolic and diastolic blood pressure. Benetou *et al.* identified in the European Prospective Investigation into Cancer and Nutrition population that below 55 years of age both anthropometric measures behaved in a similar fashion, but for those beyond that age, WC was a better marker for men and BMI for women,<sup>26</sup> a feature we were unable to explore due to the characteristics of our population.

In our population a positive association could not be demonstrated with respect to waist-to-hip ratio, as previously reported in some studies,<sup>17,22,27</sup> but not all.<sup>26,28</sup> This may be explained by the fact that our population consisted only of

men, and some previously published studies did not analyze the influence of waist-to-hip ratio by gender. Also, hip measurements include not only fat tissue but muscle and bones, that can present distinct proportions due to the physical activity involved or aging.<sup>22</sup> In fact, a large hip circumference has been associated with overall health and longevity.<sup>29</sup>

Among skinfolds, subscapular thickness presented a very good positive association with blood pressure measurements. This association has previously been described in an Italian male population,<sup>30</sup> and our results are similar. It probably reflects the amount of fat tissue centrally located. On the other hand, studies that used ambulatory blood pressure monitoring failed to demonstrate such association<sup>31</sup> and is a matter for further research. In the multivariate analysis, no skinfold was identified as an independent predictor of hypertension.

WC was the only independent predictor of hypertension in our population besides age. Age is well recognized as related to hypertension. In our sample age distribution was narrow, and may explain its small influence. Some previous studies showed that WC had the strongest association with blood pressure, but only specific and homogeneous populations were evaluated, like lean Asians,<sup>32</sup> white Americans,<sup>33</sup> or Europeans.<sup>30,33</sup> The Brazilian population is highly heterogeneous in its genetic composition due to a long history of miscegenation between portuguese settlers, african slaves and native americans. Also, regional inequalities, especially economic, are extreme. In Brazil, parts of the country present a per capita income close to developed countries and others equal to some underdeveloped nations. This latter factor may influence the food pattern of the population. So, it may behave somehow different from other groups. WC has been also reported as the only marker of adiposity associated with ambulatory blood pressure monitoring, a well validated tool to identify hypertension.<sup>31</sup>

The advantages to using the WC as a tool to be used in screening programs in developing countries like Brazil are straightforward. There is a need for a simple and unique measurement, using an inexpensive tool, that requires no calculations. Evidence for using a waist-to-height ratio is becoming available in various scenarios<sup>34–36</sup> and a recent meta-analysis indicates that it may be a better indicator for cardiovascular risk factors like hypertension,<sup>6</sup> but further research is needed. It may correct some incongruence that results from individuals with different heights and the same WC. The same tool for both measurements may be used. In our group, the waist-to-height ratio was not an independent predictor, probably a consequence of the low height variability.

Our study has several limitations that warrant recognition. First, its a cross-sectional study. Second, only men were included in the analysis due to the fact that ~10% of the working force of the plant consisted of women not included in this study, and thus may not be regarded as representative of the general population. Third, only a single visit was used to obtain blood pressure. Although all care was taken to obtain measurements using all recommendations to minimize interference, misclassification may have occurred. Finally, in order to explore the possibility of colinearity, even though we used

logistic regression models, we calculated the variance impact factor using a linear regression model of all the covariates of interest. Incremental models were applied to try to identify any change of direction that could expose colinearity without success. The resultant variance impact factor was 8.8, less than the recommended value of 10 for this factor.

In conclusion, WC, a simple and inexpensive anthropometric measurement, may be useful as an assessment tool of the risk of hypertension in the Brazilian population. It may be used in screening programs and further longitudinal studies are necessary to validate and expand these results and its value as a prognostic marker, as well as the cut-off values that better fit.

Disclosure: F.N. is speaker for Sanofi-Aventis, Daiichi-Sankyo and Novartis, and does research for Boehringer-Ingelheim e Sanofi-Aventis.

1. James WP. The epidemiology of obesity: the size of the problem. *J Intern Med* 2008; 263:336–352.
2. Kannel WB, Brand N, Skinner JJ, Dawber TR, McNamara PM. The relation of adiposity to blood pressure and development of hypertension. The Framingham study. *Ann Intern Med* 1967; 67:48–59.
3. Broom I, Wilding J, Stott P, Myers N. Randomised trial of the effect of orlistat on body weight and cardiovascular disease risk profile in obese patients: UK Multimorbidity Study. *Int J Clin Pract* 2002; 56:494–499.
4. Diet, nutrition and the prevention of chronic diseases. *World Health Organ Tech Rep Ser* 2003; 916: i–viii, 1–149, backcover.
5. Yusuf S, Hawken S, Ounpuu S, Dans T, Avezum A, Lanus F, McQueen M, Budaj A, Pais P, Varigos J, Lisheng L. Effect of potentially modifiable risk factors associated with myocardial infarction in 52 countries (the INTERHEART study): case-control study. *Lancet* 2004; 364:937–952.
6. Lee CM, Huxley RR, Wildman RP, Woodward M. Indices of abdominal obesity are better discriminators of cardiovascular risk factors than BMI: a meta-analysis. *J Clin Epidemiol* 2008; 61:646–653.
7. Is central obesity a better discriminator of the risk of hypertension than body mass index in ethnically diverse populations? *J Hypertens* 2008; 26:169–177.
8. Berber A, Gómez-Santos R, Fanghanel G, Sánchez-Reyes L. Anthropometric indexes in the prediction of type 2 diabetes mellitus, hypertension and dyslipidaemia in a Mexican population. *Int J Obes Relat Metab Disord* 2001; 25:1794–1799.
9. Dalton M, Cameron AJ, Zimmet PZ, Shaw JE, Jolley D, Dunstan DW, Welborn TA. Waist circumference, waist-hip ratio and body mass index and their correlation with cardiovascular disease risk factors in Australian adults. *J Intern Med* 2003; 254:555–563.
10. Kim J, Meade T, Haines A. Skinfold thickness, body mass index, and fatal coronary heart disease: 30 year follow up of the Northwick Park heart study. *J Epidemiol Community Health* 2006; 60:275–279.
11. Kalmijn S, Curb JD, Rodriguez BL, Yano K, Abbott RD. The association of body weight and anthropometry with mortality in elderly men: the Honolulu Heart Program. *Int J Obes Relat Metab Disord* 1999; 23:395–402.
12. Gigante DP, Dias-da-Costa JS, Olinto MT, Menezes AM, Silvia M. [Adult obesity in Pelotas, Rio Grande do Sul, Brazil, and the association with socioeconomic status]. *Cad Saude Publica* 2006; 22:1873–1879.
13. Gus I, Fischmann A, Medina C. Prevalence of risk factors for coronary artery disease in the Brazilian State of Rio Grande do Sul. *Arq Bras Cardiol* 2002; 78: 478–490.
14. Monteiro CA, D'A Benicio MH, Conde WL, Popkin BM. Shifting obesity trends in Brazil. *Eur J Clin Nutr* 2000; 54:342–346.
15. Executive Summary of The Third Report of The National Cholesterol Education Program (NCEP) Expert Panel on Detection, Evaluation, And Treatment of High Blood Cholesterol In Adults (Adult Treatment Panel III). *JAMA* 2001; 285:2486–2497.
16. Ala L, Gill G, Gurgel R, Cuevas L. Evidence for affluence-related hypertension in urban Brazil. *J Hum Hypertens* 2004; 18:775–779.
17. Fuchs FD, Gus M, Moreira LB, Moraes RS, Wiehe M, Pereira GM, Fuchs SC. Anthropometric indices and the incidence of hypertension: a comparative analysis. *Obes Res* 2005; 13:1515–1517.
18. Gus M, Fuchs SC, Moreira LB, Moraes RS, Wiehe M, Silva AF, Albers F, Fuchs FD. Association between different measurements of obesity and the incidence of hypertension. *Am J Hypertens* 2004; 17:50–53.



19. Peixoto MR, Benicio MH, Latorre MR, Jardim PC. Waist circumference and body mass index as predictors of hypertension. *Arq Bras Cardiol* 2006; 87:462–470.
20. Gustat J, Elkasabany A, Srinivasan S, Berenson GS. Relation of abdominal height to cardiovascular risk factors in young adults: the Bogalusa heart study. *Am J Epidemiol* 2000; 151:885–891.
21. Melby CL, Goldflies DG, Hyner GC. Blood pressure and anthropometric differences in regularly exercising and nonexercising black adults. *Clin Exp Hypertens A* 1991; 13:1233–1248.
22. Canoy D, Luben R, Welch A, Bingham S, Wareham N, Day N, Khaw KT. Fat distribution, body mass index and blood pressure in 22,090 men and women in the Norfolk cohort of the European Prospective Investigation into Cancer and Nutrition (EPIC-Norfolk) study. *J Hypertens* 2004; 22:2067–2074.
23. Zhao WH, Xu HQ, Zhang X, Wang JI, Yin CC, Li M, Chen JS. The association of BMI and WHR on blood pressure levels and prevalence of hypertension in middle-aged and elderly people in rural China. *Biomed Environ Sci* 2000; 13:189–197.
24. Bose K, Ghosh A, Roy S, Gangopadhyay S. Blood pressure and waist circumference: an empirical study of the effects of waist circumference on blood pressure among Bengalee male jute mill workers of Belur, West Bengal, India. *J Physiol Anthropol Appl Human Sci* 2003; 22:169–173.
25. Han TS, van Leer EM, Seidell JC, Lean ME. Waist circumference as a screening tool for cardiovascular risk factors: evaluation of receiver operating characteristics (ROC). *Obes Res* 1996; 4:533–547.
26. Benetou V, Bamia C, Trichopoulos D, Mountokalakis T, Psaltopoulou T, Trichopoulou A. The association of body mass index and waist circumference with blood pressure depends on age and gender: a study of 10,928 non-smoking adults in the Greek EPIC cohort. *Eur J Epidemiol* 2004; 19:803–809.
27. Feldstein CA, Akopian M, Olivieri AO, Kramer AP, Nasi M, Garrido D. A comparison of body mass index and waist-to-hip ratio as indicators of hypertension risk in an urban Argentine population: a hospital-based study. *Nutr Metab Cardiovasc Dis* 2005; 15:310–315.
28. Schneider HJ, Glaesmer H, Klotsche J, Böhler S, Lehnert H, Zeiher AM, März W, Pittrow D, Stalla GK, Wittchen HU. Accuracy of anthropometric indicators of obesity to predict cardiovascular risk. *J Clin Endocrinol Metab* 2007; 92:589–594.
29. Lissner L, Björkelund C, Heitmann BL, Seidell JC, Bengtsson C. Larger hip circumference independently predicts health and longevity in a Swedish female cohort. *Obes Res* 2001; 9:644–646.
30. Siani A, Cappuccio FP, Barba G, Trevisan M, Farinara E, Lacone R, Russo O, Russo P, Mancini M, Strazzullo P. The relationship of waist circumference to blood pressure: the Olivetti Heart Study. *Am J Hypertens* 2002; 15:780–786.
31. Majane OH, Norton GR, Maseko MJ, Makaula S, Crowther N, Paiker J, Thijs L, Brooksbank R, Sareli P, Staessen JA, Woodiwiss AJ. The association of waist circumference with ambulatory blood pressure is independent of alternative adiposity indices. *J Hypertens* 2007; 25:1798–1806.
32. Sakurai M, Miura K, Takamura T, Ota T, Ishizaki M, Morikawa Y, Kido T, Naruse Y, Nakagawa H. Gender differences in the association between anthropometric indices of obesity and blood pressure in Japanese. *Hypertens Res* 2006; 29: 75–80.
33. Zhu S, Wang Z, Heshka S, Heo M, Faith MS, Heymsfield SB. Waist circumference and obesity-associated risk factors among whites in the third National Health and Nutrition Examination Survey: clinical action thresholds. *Am J Clin Nutr* 2002; 76:743–749.
34. Hsieh SD, Muto T. The superiority of waist-to-height ratio as an anthropometric index to evaluate clustering of coronary risk factors among non-obese men and women. *Prev Med* 2005; 40:216–220.
35. Lin CH, Chou CY, Lin CC, Huang CC, Liu CS, Lai SW. Waist-to-height ratio is the best index of obesity in association with chronic kidney disease. *Nutrition* 2007; 23:788–793.
36. Wu HY, Chen LL, Zheng J, Liao YF, Zhou M. Simple anthropometric indices in relation to cardiovascular risk factors in Chinese type 2 diabetic patients. *Chin J Physiol* 2007; 50:135–142.
